# Supplementary material for: Expanding the phenotypic spectrum of TRAPPC11-related muscular dystrophy: 25 Roma individuals carrying a founder variant
Source: PubMed Central journal article supplement — J Med Genet. 2023 May 16;60(10):965–73. doi: 10.1136/jmg-2022-109132 (PMC10579479; doi:10.1136/jmg-2022-109132), 2023-05-16
Supplement: jmg-2022-109132supp001.pdf [file jmg-2022-109132supp001.pdf]

**Supplementary Table 1.** List of antibodies used in studies for immunohistochemistry, immunofluorescence and western blot.

| PRIMARY ANTIBODY               | CLONALITY | HOST   | DILUTION | REFERENCE                                                 | TECHNIQUE                                  |
|--------------------------------|-----------|--------|----------|-----------------------------------------------------------|--------------------------------------------|
| Dystrophin (Dys1) Rod domain   | MAb       | Mouse  | 1/100    | NCL-DYS1, Novocastra, Leica Biosystems, Newcastle, UK     | Immunohistochemistry<br>Immunofluorescence |
| Dystrophin 2 (Dys2) C terminal | MAb       | Mouse  | 1/10     | NCL-DYS2, Novocastra, Leica Biosystems, Newcastle, UK     | Immunohistochemistry<br>Immunofluorescence |
| Dystrophin 3 (dys3) N terminal | MAb       | Mouse  | 1/10     | NCL-DYS3, Novocastra, Leica Biosystems, Newcastle, UK     | Immunohistochemistry<br>Immunofluorescence |
| Beta Spectrin                  | MAb       | Mouse  | 1/50     | NCL- SEPC1, Novocastra, Leica Biosystems, Newcastle, UK   | Immunohistochemistry<br>Immunofluorescence |
| Utrophin                       | MAb       | Mouse  | 1/500    | Novocastra, NCL-DRP2, Leica Biosystems, Newcastle, UK     | Immunohistochemistry                       |
| Alpha sarcoglycan              | MAb       | Mouse  | 1/50     | Novocastra, NCL-L-a-SARC, Leica Biosystems, Newcastle, UK | Immunofluorescence                         |
| Beta Sarcoglycan               | MAb       | Mouse  | 1/20     | Novocastra, NCL-L-b-SARC Leica Biosystems, Newcastle, UK  | Immunofluorescence                         |
| Delta Sarcoglycan              | MAb       | Mouse  | 1/20     | Novocastra, NCL-L-d-SARC Leica Biosystems, Newcastle, UK  | Immunofluorescence                         |
| Gamma Sarcoglycan              | MAb       | Mouse  | 1/100    | Novocastra, NCL-L-g-SARC Leica Biosystems, Newcastle, UK  | Immunofluorescence                         |
| Alpha dystroglycan (VIA4)      | MAb       | Mouse  | 1/10     | Merck Millipore 05-298, Burlington, MA, USA               | Immunofluorescence/<br>Western Blot        |
| Alpha dystroglycan (2H6)       | MAb       | Mouse  | 1/10     | Merck Millipore 05-593, Burlington, MA, USA               | Immunofluorescence/<br>Western Blot        |
| Beta dystroglycan              | MAb       | Mouse  | 1/200    | Novocastra, NCL-b-DG, Leica Biosystems, Newcastle, UK     | Immunofluorescence                         |
| Alpha tubulin                  | Mab       | Mouse  | 1/1000   | Sigma Aldrich, T6199, USA                                 | Western Blot                               |
| Myosin Heavy Chain fast        | MAb       | Mouse  | 1/50     | Novocastra, Leica Biosystems, Newcastle, UK               | Immunohistochemistry<br>immunofluorescence |
| Myosin Heavy Chain slow        | MAb       | Mouse  | 1/50     | Novocastra, Leica Biosystems, Newcastle, UK               | Immunohistochemistry                       |
| Myosin Heavy Chain neonatal    | MAb       | Mouse  | 1/20     | Novocastra, Leica Biosystems, Newcastle, UK               | Immunohistochemistry                       |
| Myosin Heavy Chain slow        | PAb       | Rabbit | 1/200    | Invitrogen, PA5-34340                                     | Immunofluorescence                         |
| TRAPPC11 (C4ORF41)             | PAb       | Rabbit | 1/200    | Invitrogen, PA5-71454                                     | Western Blot                               |
| SECONDARY ANTIBODY             | CLONALITY | HOST   | DILUTION | REFERENCE                                                 | TECHNIQUE                                  |
| Donkey anti mouse 549          | PAb       | Donkey | 1/500    | Invitrogen, A21203                                        | Immunofluorescence                         |
| Donkey anti mouse 549          | PAb       | Goat   | 1/500    | Invitrogen, SA5-10152                                     | Immunofluorescence                         |
| Donkey anti rabbit 549         | PAb       | Goat   | 1/500    | Invitrogen, A21207                                        | Immunofluorescence                         |
