# Supplementary material for: Expanding the phenotypic spectrum of TRAPPC11-related muscular dystrophy: 25 Roma individuals carrying a founder variant
Source: PubMed Central journal article supplement — J Med Genet. 2023 May 16;60(10):965–73. doi: 10.1136/jmg-2022-109132 (PMC10579479; doi:10.1136/jmg-2022-109132), 2023-05-16
Supplement: jmg-2022-109132supp002.pdf [file jmg-2022-109132supp002.pdf]

**Supplementary Table 2. Clinical features of individuals with homozygous variant c.1287+5G>A in TRAPPC11.**

Abbreviations: M = male; F = female; y= years; IU= International Units; FM-IA= Focal motor with impaired awareness seizure; FNM-IA= Focal non-motor with impaired awareness seizure; FBTC= Focal onset to bilateral tonic-clonic seizure; GM= Generalized onset myoclonic seizures; GT= Generalized onset tonic seizures; BTC= Bilateral tonic-clonic seizures; SW= Spike-waves; NA/NP= Not available/Not performed.

| Ind | Fam | Sex | Age last exam | Intellectual disability | CK (IU)  | Muscle weakness | Muscle biopsy                | Movement disorder | Seizure onset | Infection-related seizures | Seizure types         | Status epilepticus               | Epilepsy course (Brodie class) | Current antiseizure medication | EEG                                                                                            | Brain MRI                                           |
|-----|-----|-----|---------------|-------------------------|----------|-----------------|------------------------------|-------------------|---------------|----------------------------|-----------------------|----------------------------------|--------------------------------|--------------------------------|------------------------------------------------------------------------------------------------|-----------------------------------------------------|
| 1   | 1   | F   | 13-16y        | Yes (severe)            | 300-600  | Yes             | Not performed                | No                | 6 m           | Yes                        | BTC + GT              | No                               | A                              | LEV                            | Normal background. Multifocal spikes, sharp, slow and SW, mainly left centro-parieto-temporal. | Normal                                              |
| 2   | 1   | F   | 9-12y         | Yes (severe)            | 300-1100 | Yes             | Not performed                | Yes               | 6 m           | Yes                        | FM-IA + FNM-IA + FBTC | Yes (several status with fever)  | C                              | LEV                            | Normal background. Focal sharp waves in right fronto-temporal.                                 | Generalized decrease in cortico-subcortical volume. |
| 3   | 2   | M   | 17-20y        | Yes (moderate)          | 500-1400 | Yes             | Not performed                | Yes               | 4 m           | Yes                        | BTC + FBTC + FM-IA    | Yes (febrile status epilepticus) | C                              | LEV+ OXC                       | Normal background. Multifocal SW, mainly left parieto-temporal.                                | Normal                                              |
| 4   | 3   | M   | 5-8y          | Yes (moderate)          | 500-800  | Yes             | Unspecific myopathic pattern | Yes               |               |                            |                       | No epilepsy                      |                                |                                | Normal (2x)                                                                                    | Normal                                              |
| 5   | 3   | M   | 5-8y          | Yes (moderate-severe)   | 300-500  | Yes             | Unspecific myopathic pattern | Yes               | 14 m          | Yes                        | FBTC + BTC            | Yes (Febrile status epilepticus) | B                              | LTG + VPA + CLB                | Slow background. Multifocal SWs, mainly left parieto-occipital and right parieto-temporal.     | Generalized decrease in cortico-subcortical volume. |

|    |    |   |        |                          |           |     |                              |     |      |     |            |                                  |   |           |                                                                                                                               |                                                       |                                                                     |
|----|----|---|--------|--------------------------|-----------|-----|------------------------------|-----|------|-----|------------|----------------------------------|---|-----------|-------------------------------------------------------------------------------------------------------------------------------|-------------------------------------------------------|---------------------------------------------------------------------|
| 6  | 4  | F | 13-16y | Yes<br>(moderate-severe) | 450       | Yes | Not performed                | Yes |      |     |            |                                  |   |           |                                                                                                                               | No epilepsy                                           | Generalized decrease in cortico-subcortical volume.                 |
| 7  | 4  | M | 9-12y  | Yes<br>(mild)            | NA/NP     | Yes | Not performed                | Yes |      |     |            |                                  |   |           |                                                                                                                               | No epilepsy                                           | NA/NP                                                               |
| 8  | 5  | F | 13-16y | Yes<br>(moderate)        | 800-3000  | Yes | Unspecific myopathic pattern | Yes | 6 m  | Yes | BTC        | Yes (Febrile status epilepticus) | A | LEV       | Normal background. Multifocal SWs, mainly frontal. No photosensitivity.                                                       | Generalized decrease in cortico-subcortical volume.   |                                                                     |
| 9  | 6  | F | 9-12y  | Yes<br>(severe)          | 350-750   | Yes | Not performed                | Yes | 15 m | No  | BTC        | No                               | C | LEV       | Normal background. Multifocal discharges.                                                                                     | Periventricular leukomalacia (history of prematurity) |                                                                     |
| 10 | 6  | M | 21-24y | Yes<br>(severe)          | 3500      | No  | Not performed                | Yes | 7y   | NA  | BTC        | No                               | B | No        | Slow background. Some EEG with multifocal activity: spikes in the right centrotemporal region and left centrotemporal region. | Normal                                                |                                                                     |
| 11 | 6  | M | 5-8y   | Yes<br>(moderate)        | 700-1000  | No  | Unspecific myopathic pattern | Yes |      |     |            |                                  |   |           |                                                                                                                               | No epilepsy                                           | Normal                                                              |
| 12 | 7  | F | 5-8y   | Yes<br>(moderate)        | 1700-4500 | Yes | Performed but not revised    | Yes |      |     |            |                                  |   |           |                                                                                                                               | No epilepsy                                           | Normal                                                              |
| 13 | 8  | F | 9-12y  | Yes (severe)             | 820-1500  | Yes | Unspecific myopathic pattern | Yes | 4m   | Yes | GM + FM-IA | No                               | C | VPA + OXC | Focal discharges (left centro-temporal)                                                                                       | Generalized decrease in cortico-subcortical volume.   |                                                                     |
| 14 | 9  | F | 17-20y | Yes<br>(moderate)        | 600-5000  | No  | Unspecific myopathic pattern | No  |      |     |            |                                  |   |           |                                                                                                                               | No epilepsy                                           | Normal                                                              |
| 15 | 10 | M | 5-8y   | Yes<br>(moderate)        | 1950      | Yes | Not performed                | Yes |      |     |            |                                  |   |           |                                                                                                                               | No epilepsy                                           | Bilateral parieto-occipital corticosubcortical volume decrease with |

|    |    |   |        |                       |           |     |                              |     |      |     |             |             |             |     |                                                                  |                                                                   |
|----|----|---|--------|-----------------------|-----------|-----|------------------------------|-----|------|-----|-------------|-------------|-------------|-----|------------------------------------------------------------------|-------------------------------------------------------------------|
| 16 | 10 | M | 13-16y | Yes (severe)          | 2970      | Yes | Not performed                | Yes |      |     |             | No epilepsy |             |     | Slow background activity                                         | prominence of cerebellar folia and thin corpus callosum.<br>NA/NP |
| 17 | 11 | M | 21-24y | Yes (severe)          | 1660      | No  | Unspecific myopathic pattern | Yes | 13 m | Yes | BTC         | Yes         | A           | No  | Slow background activity. Epileptic abnormalities not detected   | Normal                                                            |
| 18 | 12 | F | 9-12y  | Yes (moderate-severe) | 260-780   | No  | Not performed                | Yes | 12m  | Yes | BTC         | Yes         | A           | No  | Normal background activity. Epileptic abnormalities not detected | Normal                                                            |
| 19 | 13 | M | 5-8y   | Yes (moderate-severe) | 370       | No  | Not performed                | Yes |      |     |             |             | No epilepsy |     |                                                                  | Normal                                                            |
| 20 | 14 | F | 13-16y | Yes (severe)          | 2450      | Yes | Not performed                | No  |      |     |             |             | No epilepsy |     |                                                                  | Normal                                                            |
| 21 | 15 | M | 2-4y   | ≤ 4 years old         | 1035      | No  | Not performed                | Yes | 14m  | Yes | BTC         | No          | A           | LEV | Slow background activity. Multifocal discharges.                 | Generalized decrease in cortico-subcortical volume.               |
| 22 | 16 | M | 13-16y | Yes (grade unknown)   | 1200-2400 | Yes | Not performed                | Yes |      |     |             |             | No epilepsy |     |                                                                  | Megacisterna magna                                                |
| 23 | 17 | M | 2-4y   | ≤ 4 years old         | 550       | Yes | Not performed                | No  |      |     |             |             | No epilepsy |     |                                                                  | Not performed                                                     |
| 24 | 17 | F | 9-12y  | Yes (grade unknown)   | 330-1720  | Yes | Not performed                | No  |      |     |             |             | No epilepsy |     |                                                                  | Not performed                                                     |
| 25 | 18 | F | 17-20y | Yes (moderate-severe) | 370       | Yes | Not performed                | Yes | 8y   | Yes | FM-IA + BTC | No          | A           | LEV | Slow background activity. Epileptic abnormalities not detected   | Normal                                                            |
