# Supplementary material for: Expanding the phenotypic spectrum of TRAPPC11-related muscular dystrophy: 25 Roma individuals carrying a founder variant
Source: PubMed Central journal article supplement — J Med Genet. 2023 May 16;60(10):965–73. doi: 10.1136/jmg-2022-109132 (PMC10579479; doi:10.1136/jmg-2022-109132), 2023-05-16
Supplement: jmg-2022-109132supp003.pdf [file jmg-2022-109132supp003.pdf]

**Supplementary Table 3.** Main features of muscle biopsies of individuals with homozygous variant c.1287+5G>A in *TRAPPC11*.

|                                                            | Age at biopsy | Location         | Fibrosis | Adipose tissue | Fibre size                              | Internal nuclei | Basophilic fibres   | Regenerative fibres | Hpercontracted fibres | Necrosis | Intermyofibrillar pattern             | Cox negative fibres | Lipids            | Fibre type distribution                                    | Sarcolemma protein staining         | ADG (IIF6)                                                          | ADG (Via4)                                                          | Beta-DG        |
|------------------------------------------------------------|---------------|------------------|----------|----------------|-----------------------------------------|-----------------|---------------------|---------------------|-----------------------|----------|---------------------------------------|---------------------|-------------------|------------------------------------------------------------|-------------------------------------|---------------------------------------------------------------------|---------------------------------------------------------------------|----------------|
| <b>Individual 4</b>                                        | 3             | Left quadriceps  | No       | No             | Moderate variability. Diameter 15-55 µm | <1%             | 5% (some in groups) | 3%                  | 1%                    | Yes      | Intermyofibrillar pattern disruptions | No                  | No lipid increase | Normal mosaic pattern. Selective fast fibres atrophy.      | Normal positive sarcolemma staining | Mosaic pattern with hyperintensity and hypointensity in some fibres | Mosaic pattern with hyperintensity and hypointensity in some fibres | Normal         |
| <b>Individual 5</b>                                        | 3             | Left quadriceps  | No       | No             | Mild variability. Diameter 21-42 µm     | <1%             | No                  | <1%                 | 5%                    | No       | Intermyofibrillar pattern disruptions | No                  | No lipid increase | Normal mosaic distribution.                                | Normal positive sarcolemma staining | Normal                                                              | Normal                                                              | Normal         |
| <b>Individual 8</b>                                        | 12            | Left deltoids    | No       | No             | Mild variability. Diameter 50-95 µm     | 5%              | 2%                  | <2%                 | 5%                    | No       | Intermyofibrillar pattern disruptions | No                  | No lipid increase | Normal mosaic distribution.                                | Normal positive sarcolemma staining | Mosaic pattern with hypointensity globally                          | Mosaic pattern with hypointensity globally                          | Normal         |
| <b>Individual 11</b>                                       | 3             | Right quadriceps | No       | No             | Moderate variability. Diameter 30-40 µm | 2%              | 1%                  | <1%                 | 5%                    | No       | Intermyofibrillar pattern disruptions | No                  | No lipid increase | Normal mosaic distribution.                                | Normal positive sarcolemma staining | Mosaic pattern with hypointensity globally                          | Mosaic pattern with hypointensity globally                          | Normal         |
| <b>Individual 13</b>                                       | 1,5           | Quadriceps       | No       | No             | Mild variability. Diameter 15-34 µm     | 1%              | 1%                  | <1%                 | 7%                    | No       | Intermyofibrillar pattern disruptions | No                  | No lipid increase | Normal mosaic distribution. Slow fibre type prevalence     | Normal positive sarcolemma staining | Mosaic pattern with hyperintensity and hypointensity in some fibres | Mosaic pattern with hyperintensity and hypointensity in some fibres | Normal         |
| <b>Individual 14</b>                                       | 12            | Unknown          | No       | No             | No variability                          | 2%              | No                  | No                  | No                    | No       | Intermyofibrillar pattern disruptions | No                  | No lipid increase | Not assessable                                             | Normal positive sarcolemma staining | Not assessable                                                      | Not assessable                                                      | Not assessable |
| <b>Individual 17</b>                                       | 4             | Right quadriceps | No       | No             | Mild variability. Diameter 25-90 µm     | <1%             | No                  | 1%                  | 2%                    | No       | Intermyofibrillar pattern disruptions | No                  | No lipid increase | Normal mosaic distribution. Selective fast fibres atrophy. | Normal positive sarcolemma staining | Mosaic pattern with hyperintensity and hypointensity in some fibres | Mosaic pattern with hyperintensity and hypointensity in some fibres | Normal         |
| <b>Control individual without a neuromuscular disorder</b> | 5             | Right quadriceps | No       | No             | No variability                          | <1%             | No                  | No                  | No                    | No       | Normal                                | No                  | No lipid increase | Normal mosaic distribution.                                | Normal positive sarcolemma staining | Normal                                                              | Normal                                                              | Normal         |
